# Supplementary material
Source: PubMed Central journal article supplement (PMC3745277)
Supplement: NIHMS493485-supplement-1.pdf [file NIHMS493485-supplement-1.pdf]

## SUPPLEMENTARY TABLES

Table S1

| Selected miR | Direction of aberrant expression per esophageal tissue type (compared to NSE) |     |     |     | Type of miR based on literature | Reference(s) |
|--------------|-------------------------------------------------------------------------------|-----|-----|-----|---------------------------------|--------------|
|              | BE-ND                                                                         | LGD | HGD | EAC |                                 |              |
| miR199a/b-3p | -                                                                             | -   | -   | ↑   | Unknown                         | (1, 2)       |
| miR-199a-5p  | ↑                                                                             | -   | ↑   | ↑   | BE-miR                          | (1-3)        |
| miR-199b-5p  | ↑                                                                             | -   | ↑   | ↑   | BE-miR                          | (3)          |
| miR-200b     | =/↓                                                                           | -   | -   | ↓   | Indefinite                      | (4)          |
| miR-200c     | =/↓                                                                           | -   | -   | ↓   | Indefinite                      | (4)          |
| miR-223      | -                                                                             | -   | -   | ↑   | Unknown                         | (5)          |
| miR-375      | ↓                                                                             | -   | ↓   | ↓   | Neo-miR                         | (3, 6, 7)    |

Abbreviations: miR, microRNA; NSE, normal squamous epithelium; BE-ND, non-dysplastic Barrett's esophagus; LGD/HGD, low/high-grade dysplasia; EAC, esophageal adenocarcinoma

Table S1: Literature-based miR selection for qRT-PCR validation in a chemo-radiation naïve EAC cohort. Two types of miRs were chosen; miRs that may play a role in the development of BE-ND (BE-miRs) and miRs that may be involved in the neoplastic progression of BE (Neo-miRs).

Table S2

| Quantitative real-time PCR primers |                       |                        |
|------------------------------------|-----------------------|------------------------|
| Gene                               | Forward 5' to 3'      | Reverse 5' to 3'       |
| GAPDH                              | AGCCTCCCGCTTCGCTCTCT  | GCGCCAATACGACCAAATCCGT |
| PARP1                              | CGAGGCGGCAGCGTGTTTCT  | GCCCGCTCTTGGCGTACTCG   |
| MT1E                               | AGAGCAGCCAGTTGCAGGGC  | GAGCCACCAGTGGCGCAAGA   |
| CYB5A                              | GGTGGAGCTGGCTGAGTCGC  | GCCTCGTCCGACTGCTCTGC   |
| SMARCD1                            | ACCCCGCCTAGCTCGACTC   | TCCCGCTCGTGAGGGTCCTG   |
| STMN1                              | CTCTCGGCCAATGCGGAGCC  | CGAGCCGCCTGACCACACTC   |
| SLC11A2                            | TGGGCTTTCACCGGACCAGG  | GGAGCAGCAGCCCCACAAGG   |
| SLC39A1                            | AGCCTTGACGTGACGCTCC   | AGGTGACGGCCCTGACTGCT   |
| WDR40A                             | ACCCGCCGTCCTGCTATCCT  | GGCGCTTCCGCTTCCTGCT    |
| GFPT1                              | CGGGAGGCGGAGAAGGCTGT  | GGGGGTGCACACACGAGCTT   |
| KIAA1279                           | ATGGCGAACGTTCCGTGGGC  | GCCCGGGCGCTGTATTTGGA   |
| LMO2                               | TTGGGTCCTGCAGGGCTTGCT | GGCGGAGCCTTACCCTTGC    |

Table S2: Quantitative real-time PCR primers used for the validation of the Illumina microarray results.

Table S3

| Gene      | Full name                                                                                         | Average fold change miR-223 versus Mock OE33 cells (Illumina microarray) | Binding of miR-223 to 3'UTR gene predicted by: |            | Match miR-223 and 3'UTR gene |
|-----------|---------------------------------------------------------------------------------------------------|--------------------------------------------------------------------------|------------------------------------------------|------------|------------------------------|
|           |                                                                                                   |                                                                          | MicroCosm                                      | TargetScan |                              |
| PARP1     | Poly (ADP-ribose) polymerase 1                                                                    | -2.42                                                                    | Yes                                            | Yes        | 8mer                         |
| MT1E      | Metallothionein 1E                                                                                | -2.27                                                                    | Yes                                            | Yes        | 7mer-1A                      |
| TNFRSF12A | Tumor necrosis factor receptor superfamily, member 12A                                            | -2.22                                                                    | No                                             | No         |                              |
| FAM104A   | Family with sequence similarity 104, member A                                                     | -2.13                                                                    | No                                             | No         |                              |
| CXCL1     | Chemokine (C-X-C motif) ligand 1 (melanoma growth stimulating activity)                           | -1.91                                                                    | No                                             | No         |                              |
| CYB5A     | Cytochrome b5 type A (microsomal)                                                                 | -1.91                                                                    | Yes                                            | Yes        | 8mer                         |
| TUBAP2    | Tubulin, alpha pseudogene 2                                                                       | -1.88                                                                    | Not listed                                     | Not listed |                              |
| SLC11A2   | Solute carrier family 11, member 2                                                                | -1.84                                                                    | Yes                                            | Yes        | 8mer                         |
| SLC39A1   | solute carrier family 39 , member 1                                                               | -1.84                                                                    | Yes                                            | Yes        | 7mer-m8                      |
| HS.574590 | -                                                                                                 | -1.80                                                                    | Not listed                                     | Not listed |                              |
| SMARCD1   | SWI/SNF related, matrix associated, actin dependent regulator of chromatin, subfamily d, member 1 | -1.79                                                                    | No                                             | Yes        | 8mer                         |
| LOC643272 | -                                                                                                 | -1.78                                                                    | Not listed                                     | Not listed |                              |
| MT1IP     | Metallothionein 1L, pseudogene                                                                    | -1.78                                                                    | Not listed                                     | Not listed |                              |
| MANBAL    | Mannosidase, beta A, lysosomal-like                                                               | -1.77                                                                    | Yes                                            | Yes        | 8mer                         |
| STMN1     | Stathmin 1                                                                                        | -1.75                                                                    | Yes                                            | Yes        | 7mer-m8                      |
| PURB      | Purine-rich element binding protein B                                                             | -1.74                                                                    | No                                             | Yes        | 8mer                         |
| AIDA      | Axin interactor, dorsalization associated                                                         | -1.73                                                                    | Not listed                                     | Yes        | 7mer-1A                      |
| ARL2BP    | ADP-ribosylation factor-like 2 binding protein                                                    | -1.70                                                                    | No                                             | No         |                              |
| IGSF3     | Immunoglobulin superfamily, member 3                                                              | -1.69                                                                    | Yes                                            | Yes        | 8mer                         |
| UBXN1     | UBX domain protein 1                                                                              | -1.69                                                                    | Not listed                                     | Yes        | 7mer-1A                      |
| ATP1B1    | ATPase, Na <sup>+</sup> /K <sup>+</sup> transporting, beta 1 polypeptide                          | -1.67                                                                    | Yes                                            | Yes        | 7mer-m8                      |
| BLCAP     | Bladder cancer associated protein                                                                 | -1.67                                                                    | No                                             | No         |                              |
| TMEM14D   | Transmembrane protein 14 D (pseudogene)                                                           | -1.66                                                                    | Not listed                                     | Not listed |                              |
| LOC653631 | -                                                                                                 | -1.66                                                                    | Not listed                                     | Not listed |                              |
| FOSL1     | FOS-like antigen 1                                                                                | -1.66                                                                    | No                                             | No         |                              |

Table S3 (continued)

| Gene     | Full name                                                                               | Average fold change miR-223 versus Mock OE33 cells (Illumina microarray) | Binding of miR-223 to 3'UTR gene predicted by: |            | Match miR-223 and 3'UTR gene |
|----------|-----------------------------------------------------------------------------------------|--------------------------------------------------------------------------|------------------------------------------------|------------|------------------------------|
|          |                                                                                         |                                                                          | MicroCosm                                      | TargetScan |                              |
| GFPT1    | Glutamine-fructose-6-phosphate transaminase 1                                           | -1.65                                                                    | Yes                                            | Yes        | 8mer                         |
| TOMM5    | Translocase of outer mitochondrial membrane 5 homolog (yeast)                           | -1.64                                                                    | Not listed                                     | Yes        | 7mer-m8                      |
| ARL6IP1  | ADP-ribosylation factor-like 6 interacting protein 1                                    | -1.64                                                                    | No                                             | No         |                              |
| BOLA3    | Bola homolog 3                                                                          | -1.63                                                                    | No                                             | No         |                              |
| SLMO2    | Slowmo homolog 2                                                                        | -1.62                                                                    | No                                             | Yes        | 7mer-m8                      |
| ATP6V1D  | ATPase, H <sup>+</sup> transporting, lysosomal 34kDa, V1 subunit D                      | -1.62                                                                    |                                                | No         |                              |
| RAC1     | Ras-related C3 botulinum toxin substrate 1 (rho family, small GTP binding protein Rac1) | -1.61                                                                    | No                                             | No         |                              |
| TMED10   | Transmembrane emp24-like trafficking protein 10                                         | -1.60                                                                    | No                                             | Yes        | 7mer-1A                      |
| LMO2     | LIM domain only 2 (rhombotin-like 1)                                                    | -1.60                                                                    | No                                             | Yes        | 8mer                         |
| DCAF12   | DDB1 and CUL4 associated factor                                                         | -1.60                                                                    | Not listed                                     | Yes        | 7mer-m8                      |
| ARHGDI A | Rho GDP dissociation inhibitor (GDI) alpha                                              | -1.59                                                                    | No                                             | No         |                              |
| ABRACL   | ABRA C-terminal like                                                                    | -1.58                                                                    | Not listed                                     | Not listed |                              |
| MPP5     | membrane protein, palmitoylated 5 (MAGUK p55 subfamily member 5)                        | -1.58                                                                    | Not listed                                     | Yes        | 8mer                         |
| CTSL2    | Cathepsin L2                                                                            | -1.58                                                                    | Yes                                            | Yes        | 7mer-m8                      |
| GCLM     | Glutamate-cysteine ligase, modifier subunit                                             | -1.57                                                                    | Not listed                                     | Yes        | 7mer-m8                      |
| TMEM14B  | Transmembrane protein 14B                                                               | -1.57                                                                    | Not listed                                     | Not listed |                              |
| KIAA1279 | KIAA1279                                                                                | -1.56                                                                    | Yes                                            | Yes        | 7mer-m8                      |
| DESI2    | Desumoylating isopepidase 2                                                             | -1.56                                                                    | Not listed                                     | Not listed |                              |
| THUMPD1  | THUMP domain containing 1                                                               | -1.55                                                                    | No                                             | Yes        | 7mer-m8/7mer-1a              |
| EPHX1    | Epoxide hydrolase 1, microsomal (xenobiotic)                                            | -1.55                                                                    | No                                             | No         |                              |
| PSMD11   | Proteasome (prosome, macropain) 26S subunit, non-ATPase                                 | -1.55                                                                    | No                                             | No         |                              |
| DBT      | Dihydrolipoamide brached chain transacylase E2                                          | -1.54                                                                    | No                                             | Yes        | 7mer-m8/7mer-1a              |

Table S3 (continued)

| Gene    | Full name                                                                        | Average fold change miR-223 versus Mock OE33 cells (Illumina microarray) | Binding of miR-223 to 3'UTR gene predicted by: |            | Match miR-223 and 3'UTR gene |
|---------|----------------------------------------------------------------------------------|--------------------------------------------------------------------------|------------------------------------------------|------------|------------------------------|
|         |                                                                                  |                                                                          | MicroCosm                                      | TargetScan |                              |
| SETP18  | SET pseudogene 18                                                                | -1.53                                                                    | Not listed                                     | Not listed |                              |
| RCN2    | Reticulocalbin 2, EF-hand calcium binding domain                                 | -1.53                                                                    | Yes                                            | Yes        | 8mer                         |
| CMPK1   | Cytidine monophosphate (UMP-CMP) kinase 1, cytosolic                             | -1.53                                                                    | Not listed                                     | Yes        | 7mer-m8                      |
| NEU1    | Sialidase 1 (lysosomal sialidase)                                                | -1.52                                                                    | No                                             | No         |                              |
| CCT3    | Chaperonin containing TCP1, subunit 3                                            | -1.52                                                                    | Yes                                            | Yes        | 7mer-1A                      |
| SLC19A1 | Solute carrier family 19 (folate transporter), member 1                          | -1.52                                                                    | No                                             | Yes        | 7mer-m8                      |
| PTRF    | Polymerase I and transcript release factor                                       | -1.51                                                                    | No                                             | No         |                              |
| DLST    | Dihydrolipoamide S-succinyltransferase (E2 component of 2-oxo-glutarate complex) | -1.51                                                                    | No                                             | No         |                              |
| NIPAL3  | NIPA-like domain containing 3                                                    | -1.51                                                                    | Not listed                                     | Yes        | 8mer                         |
| MT1P3   | Metallothionein 1 pseudogene 3                                                   | -1.51                                                                    | Not listed                                     | Not listed |                              |
| FKBP1C  | FK506 binding protein 1C                                                         | -1.50                                                                    | Not listed                                     | Not listed |                              |

Abbreviations:

8mer: an exact match to positions 2-8 of miR-223 (the seed + position 8) followed by an 'A';

7mer-m8: an exact match to positions 2-8 of miR-223 (the seed + position 8);

7mer-1A: an exact match to positions 2-7 of miR-223 (the seed) followed by an 'A'.

Table S3: Illumina microarray results of OE33 miR-223 cells compared to OE33 mock cells (two biological replicates). Genes more than 1.5 fold down-regulated are listed in this table. The prediction models MicroCosm (<http://www.ebi.ac.uk/enright-srv/microcosm/htdocs/targets/v5/>) and TargetScan (8) were queried to find out whether binding of miR-223 to the 3'UTR of the potential target gene is likely. The type of match between miR-223 and the 3'UTR is also given.

## REFERENCES

1. Feber A, Xi L, Luketich JD, Pennathur A, Landreneau RJ, Wu M, et al. MicroRNA expression profiles of esophageal cancer. *The Journal of thoracic and cardiovascular surgery*. 2008;135(2):255-60; discussion 60. Epub 2008/02/05.
2. Yang H, Gu J, Wang KK, Zhang W, Xing J, Chen Z, et al. MicroRNA expression signatures in Barrett's esophagus and esophageal adenocarcinoma. *Clinical cancer research : an official journal of the American Association for Cancer Research*. 2009;15(18):5744-52. Epub 2009/09/10.
3. Leidner RS, Ravi L, Leahy P, Chen Y, Bednarchik B, Streppel M, et al. The microRNAs, MiR-31 and MiR-375, as candidate markers in Barrett's esophageal carcinogenesis. *Genes, chromosomes & cancer*. 2012;51(5):473-9. Epub 2012/02/04.
4. Smith CM, Watson DI, Leong MP, Mayne GC, Michael MZ, Wijnhoven BP, et al. miR-200 family expression is downregulated upon neoplastic progression of Barrett's esophagus. *World journal of gastroenterology : WJG*. 2011;17(8):1036-44. Epub 2011/03/31.
5. Mathe EA, Nguyen GH, Bowman ED, Zhao Y, Budhu A, Schetter AJ, et al. MicroRNA expression in squamous cell carcinoma and adenocarcinoma of the esophagus: associations with survival. *Clinical cancer research : an official journal of the American Association for Cancer Research*. 2009;15(19):6192-200. Epub 2009/10/01.
6. Bansal A, Lee IH, Hong X, Anand V, Mathur SC, Gaddam S, et al. Feasibility of microRNAs as biomarkers for Barrett's Esophagus progression: a pilot cross-sectional, phase 2 biomarker study. *The American journal of gastroenterology*. 2011;106(6):1055-63. Epub 2011/03/17.
7. Nguyen GH, Schetter AJ, Chou DB, Bowman ED, Zhao R, Hawkes JE, et al. Inflammatory and microRNA gene expression as prognostic classifier of Barrett's-associated esophageal adenocarcinoma. *Clinical cancer research : an official journal of the American Association for Cancer Research*. 2010;16(23):5824-34. Epub 2010/10/16.
8. Lewis BP, Burge CB, Bartel DP. Conserved seed pairing, often flanked by adenosines, indicates that thousands of human genes are microRNA targets. *Cell*. 2005;120(1):15-20. Epub 2005/01/18.
