# Supplementary material
Source: PubMed Central journal article supplement (PMC3745277)
Supplement: NIHMS493485-supplement-2.pdf [file NIHMS493485-supplement-2.pdf]

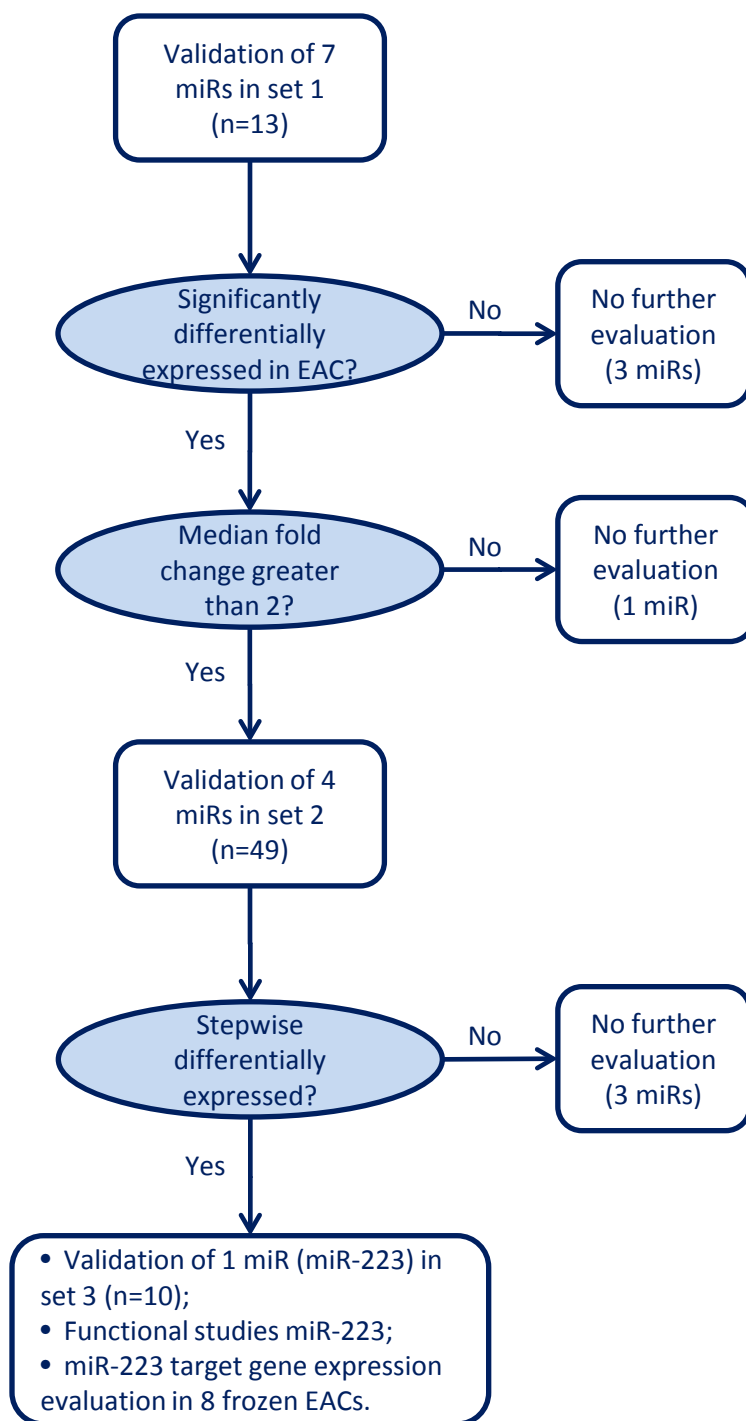

**Set 1:** 13 chemo radiation-naïve EAC and matched NSE FFPE specimens

**Set 2:** 49 precursor and EAC lesions and matched NSE specimens from 32 chemo radiation-naïve “progressors”:

- 11 CARDIA (FFPE)
- 13 BE-ND (FFPE)
- 17 HGD (FFPE)
- 8 EAC (frozen)

**Set 3:** 10 BE-ND and matched NSE frozen specimens
